# Supplementary material for: The Contribution of Liver Sinusoidal Endothelial Cells to Clearance of Therapeutic Antibody
Source: Frontiers journal article supplement (doi:10.3389/fphys.2021.753833), 2022-01-14
Supplement: Table_1.doc [file Table_1.doc]

| **Clinical Challenge** | **Explanation** | **Mitigating Strategy** |
| --- | --- | --- |
| Impact of LSEC Fc receptors on antibody PK | Accelerated or delayed clearance of circulating antibody | Modify Fc portion to enhance interaction with FcRn and improve half life  Modify Fc portion to minimize interaction with FcRIIb |
| Localized hepatotoxicity or DILI in reponse to antibody therapy in humans | Enhanced deposition and clearance by LSEC leading to vasculotoxicity | Analysis of Fc portion and specific testing of clearance by human FcR to minimize crosslinking and activation in sinusoid |
| Complement mediated toxicity/Sinusoidal obstruction syndrome associated with antibody therapy | Immune complex binding to LSEC and cell apoptosis leading to exposure of basal lamina | Careful screening for binding to Fc receptors on LSEC |
| Altered antibody PK in older patients or patients with underlying liver disease | LSEC capillarization, reduction in hepatic albumin production | Careful screening for pre-existing disease in patient populations. Age-dependent pharmacokinetic assessment at Phase 1 testing |
| Complications due to autoantibody production in hepatic autoimmunity | LSEC capillarization or autoantibody occupancy of FcRs impacting on PK | Use of FcRn blockers to enhance IgG degradation |
| Desire to improve half life of therapeutic antibody | Accelerated clearance by hepatic FcRIIb | Engineering of Fc portion to minimize interaction or delay internalization of receptor |
| Lack of clinical efficacy upon testing in human subjects | Reduced abilities of rodent or primate models to recreate human hepatic antibody clearance | Inclusion of human cell based or tissue array screens in pre-trail development stages |
